# Supplementary material
Source: publisher figshare collection journal article supplement (https://rs.figshare.com/ndownloader/files/12818504)
Supplement: Supplementary file 1 [file 12818504]

## Sheet: Sheet1
Analysis type	extant bivalvia median	extinct bivalvia median	extant gastropoda median	extinct gastropoda median	Bivalvia p-value	Gastropoda p-value	Bivalvia effect size	Gastropoda effect size
ALL SPECIES
B_species	0.00129625	0.00550406	3.815e-05	6.87e-05	1.54369e-06	0.000463228	0.45	0.36
Bs_min_temp	0.00200643	0.00630507	5.615e-05	8.64e-05	0.000316438	0.00453188	0.34	0.29
Bs_max_temp	0.00437909	0.0139515	0.00011788	0.000194376	0.000100597	0.0087247	0.36	0.27
Bs_no_temp	269934691	750406323	7317095	10454894	0.000874801	0.0461252	0.31	0.21
Bs_no_constant	9.26e-15	3.93e-14	5.67e-13	9.89e-13	1.09911e-06	0.000217459	0.45	0.38
Bs_size	0.00152165	0.00499872	3.89e-05	6.36e-05	1.543e-06	0.0009756	0.49	0.37
BROAD SPECIES
B_species	0.00152165	0.00271393	5.72e-05	9.84955e-05	0.137325	0.0849389	NA	NA
Bs_min_temp	0.00317966	0.00346272	7.75e-05	0.000112835	0.361379	0.193573	NA	NA
Bs_max_temp	0.00718814	0.00809224	0.000181517	0.000235421	0.307399	0.212036	NA	NA
Bs_no_temp	449274098	450668187	12108194	12662515	0.51489	0.595851	NA	NA
Bs_no_constant	1.09e-14	1.94e-14	7.75e-13	1.47e-12	0.130484	0.0405072	NA	0.49
Bs_size	0.00213356	0.00271393	4.77e-05	6.42e-05	0.1677	0.0473	NA	0.52
NARROW SPECIES
B_species	0.000845789	0.00628999	3.68e-05	6.74e-05	7.50648e-07	0.00296105	0.6	0.34
Bs_min_temp	0.00150833	0.00756723	4.72e-05	8.3e-05	8.3088e-05	0.0159209	0.48	0.28
Bs_max_temp	0.00358826	0.0157883	0.000110906	0.00018018	3.43928e-05	0.0226545	0.5	0.26
Bs_no_temp	256186294	875729301	6419879	10069242	0.000156754	0.0700355	0.46	0.21
Bs_no_constant	6.24e-15	4.8e-14	5.59e-13	9.5e-13	4.92603e-07	0.00239704	0.61	0.35
Bs_size	0.00104591	0.00619004	3.885e-05	5.955e-05	2.878e-07	0.009417	0.64	0.33
